# Supplementary material
Source: Springer Nature journal article supplement (http://www.springermedizin.de/resource/supplementary/12968_2011_2617_MOESM10_ESM.pdf/9582342)

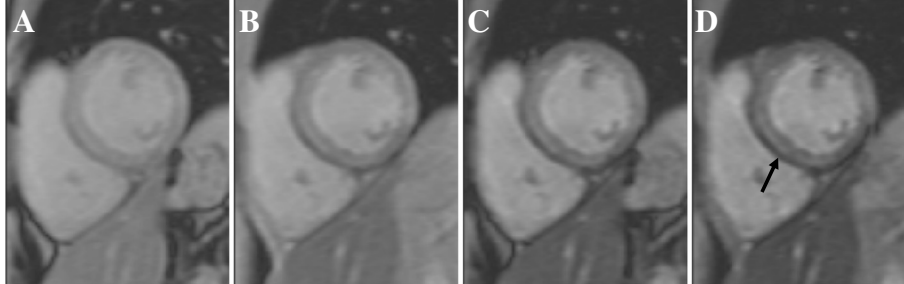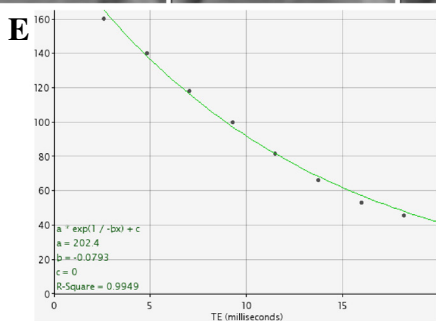

| Segment    | 1            |
|------------|--------------|
| TE 2.58    | 157.62       |
| TE 4.81    | 136.05       |
| TE 7.04    | 113.93       |
| TE 9.27    | 95.64        |
| TE 11.5    | 77.42        |
| TE 13.73   | 62.11        |
| TE 15.96   | 50.17        |
| TE 18.19   | 44.08        |
| <b>T2+</b> | <b>12.11</b> |

Supplement: MOESM10 [file 9582342]
